# Supplementary material for: Relationships between Rhizosphere Environments and Growth of 10-Year-Old Wild-Simulated Ginseng
Source: MDPI journal article supplement (doi:10.3390/agronomy13051313), 2023-05-07
Supplement: s1 [file s1]

**Table S1.** The relative abundance of classes in *Proteobacteria* phylum of cultivation site “A” and “B”

| Bacterial community<br>(Class) | A        | B        |
|--------------------------------|----------|----------|
| Alpha-proteobacteria           | 46.05272 | 49.46486 |
| Beta-proteobacteria            | 21.04822 | 20.33279 |
| Gamma-proteobacteria           | 11.94957 | 13.80833 |
| Delta-proteobacteria           | 20.94949 | 16.39402 |

**Table S2.** Relationship between the relative abundance of the soil bacterial communities and growth characteristics of wild-simulated ginseng using Spearman's rank correlation analysis

| Bacterial community     | Growth characteristics |               |                          |                |                |                |                |                |               |                 |                |                |               |
|-------------------------|------------------------|---------------|--------------------------|----------------|----------------|----------------|----------------|----------------|---------------|-----------------|----------------|----------------|---------------|
|                         | Stem length            | Stem diameter | No. of leaflets per stem | Petiole length | Leaflet length | Leaflet width  | Rhizome length | Root diameter  | Root length   | No. of rootlets | Total weight   | Root weight    | Dry weight    |
| <i>Proteobacteria</i>   | 0.173                  | 0.343         | <b>0.560*</b>            | 0.172          | 0.272          | 0.403          | 0.282          | <b>0.614*</b>  | 0.443         | 0.338           | <b>0.529*</b>  | <b>0.549*</b>  | <b>0.525*</b> |
| <i>Acidobacteria</i>    | -0.163                 | -0.368        | -0.365                   | -0.483         | -0.125         | 0.125          | <b>-0.632*</b> | -0.393         | -0.281        | <b>-0.551*</b>  | -0.325         | -0.340         | -0.361        |
| <i>Verrucomicrobia</i>  | 0.318                  | 0.425         | 0.296                    | 0.501          | 0.155          | -0.043         | 0.500          | 0.304          | 0.268         | 0.397           | 0.318          | 0.322          | 0.379         |
| <i>Actinobacteria</i>   | 0.377                  | <b>0.557*</b> | <b>0.600*</b>            | 0.497          | 0.450          | 0.406          | <b>0.625*</b>  | <b>0.661**</b> | <b>0.552*</b> | <b>0.526*</b>   | <b>0.675**</b> | <b>0.679**</b> | <b>0.632*</b> |
| <i>Chloroflexi</i>      | 0.141                  | 0.050         | -0.178                   | 0.285          | -0.114         | -0.256         | 0.271          | -0.196         | -0.098        | -0.052          | -0.146         | -0.234         | -0.250        |
| <i>Planctomycetes</i>   | -0.143                 | 0.050         | 0.245                    | 0.158          | -0.084         | -0.170         | 0.196          | 0.200          | 0.222         | 0.530*          | 0.150          | 0.247          | 0.268         |
| <i>Bacteroidetes</i>    | -0.057                 | 0.239         | 0.289                    | 0.212          | -0.045         | -0.184         | 0.429          | 0.211          | 0.075         | <b>0.535*</b>   | 0.046          | 0.064          | 0.114         |
| <i>Gemmatimonadetes</i> | -0.027                 | -0.075        | -0.230                   | 0.081          | -0.232         | -0.355         | 0.146          | -0.239         | -0.013        | -0.064          | -0.218         | -0.252         | -0.182        |
| <i>Firmicutes</i>       | <b>0.672**</b>         | <b>0.604*</b> | 0.259                    | 0.474          | <b>0.754**</b> | <b>0.697**</b> | <b>0.632*</b>  | 0.446          | 0.214         | 0.061           | <b>0.543*</b>  | 0.452          | 0.246         |
| <i>Nitrospirae</i>      | 0.141                  | 0.261         | 0.319                    | 0.320          | -0.071         | -0.218         | 0.425          | 0.254          | 0.161         | 0.315           | 0.171          | 0.209          | 0.254         |

Spearman's rho values ( $r$ ) written are significantly correlated between the variables compared. Negative values denote negative correlation and positive values denote positive correlation. \* $p < 0.05$ , \*\* $p < 0.01$ .
